# Supplementary material
Source: PubMed Central journal article supplement (PMC6369710)
Supplement: NIHMS1009998-supplement-Supplemental_Table.pdf [file NIHMS1009998-supplement-Supplemental_Table.pdf]

**Supplemental Table 1. Quantification of Ptd<sub>2</sub>Gro species in mouse tissues except brain. Concentration nmol/mg protein.**

| Ptd2Gro species                      | [M-2H] <sup>2</sup> + 0.5 | iBAT             | Subq WAT         | Heart            | Panc             | Liver             | Muscle           | Kidney           |
|--------------------------------------|---------------------------|------------------|------------------|------------------|------------------|-------------------|------------------|------------------|
| 18:2-18:2-16:1                       | 579.8653                  | 0.00501 ± 0.0027 | 0.0057 ± 0.001   | 0.014 ± 0.0016   | 0.01 ± 0.0037    | 0.017 ± 0.0039    | 0.012 ± 0.005    | 0.03 ± 0.0062    |
| 18:2-18:2-16:0, 18:2-18:1-16:1 (3:1) | 580.8723                  | 0.012 ± 0.0044   | 0.0062 ± 0.00029 | 0.02 ± 0.0037    | 0.015 ± 0.00092  | 0.014 ± 0.0046    | 0.015 ± 0.0014   | 0.035 ± 0.0069   |
| 18:2-18:1-16:0                       | 581.8803                  | 0.0098 ± 0.003   | 0.005 ± 0.00083  | 0.013 ± 0.0021   | 0.015 ± 0.0015   | 0.0079 ± 0.0016   | 0.0078 ± 0.0017  | 0.025 ± 0.0043   |
| 18:1-18:1-16:0                       | 582.8883                  | 0.0053 ± 0.0018  | 0.0046 ± 0.00033 | 0.0091 ± 0.0017  | 0.014 ± 0.0023   | 0.0062 ± 0.00069  | 0.0093 ± 0.0035  | 0.018 ± 0.0019   |
| 18:2-18:2-18:3                       | 591.8653                  | 0.0039 ± 0.0018  | 0.004 ± 0.00085  | 0.011 ± 0.0018   | 0.0097 ± 0.0024  | 0.0085 ± 0.0014   | 0.0057 ± 0.0019  | 0.021 ± 0.0034   |
| 18:2-18:2-18:2                       | 592.8723                  | 0.084 ± 0.029    | 0.036 ± 0.0073   | 0.44 ± 0.08      | 0.39 ± 0.082     | 0.14 ± 0.024      | 0.1 ± 0.047      | 0.46 ± 0.07      |
| 18:2-18:2-18:1                       | 593.8803                  | 0.059 ± 0.019    | 0.03 ± 0.0046    | 0.22 ± 0.035     | 0.14 ± 0.027     | 0.062 ± 0.0093    | 0.056 ± 0.024    | 0.3 ± 0.046      |
| 18:2-18:1-18:1                       | 594.9883                  | 0.011 ± 0.0019   | 0.019 ± 0.0019   | 0.013 ± 0.0034   | 0.0093 ± 0.0023  | 0.016 ± 0.0024    | 0.022 ± 0.0064   | 0.016 ± 0.0002   |
| 18:2-18:1-18:0, 18:1-18:1-18:1 (1:1) | 595.8963                  | 0.011 ± 0.0025   | 0.012 ± 0.0032   | 0.016 ± 0.0027   | 0.0079 ± 0.001   | 0.0073 ± 0.0019   | 0.0094 ± 0.00099 | 0.025 ± 0.0037   |
| 18:1-18:1-18:0                       | 596.9043                  | 0.0039 ± 0.00096 | 0.0052 ± 0.0012  | 0.0073 ± 0.0023  | 0.0046 ± 0.00035 | 0.0052 ± 0.001    | 0.0082 ± 0.0017  | 0.012 ± 0.00087  |
| 18:2-18:2-20:4                       | 604.8723                  | 0.0059 ± 0.0011  | 0.005 ± 0.000069 | 0.025 ± 0.0042   | 0.019 ± 0.0031   | 0.0082 ± 0.0012   | 0.013 ± 0.0024   | 0.058 ± 0.0071   |
| 18:2-18:2-20:3                       | 605.8803                  | 0.0077 ± 0.0014  | 0.0066 ± 0.001   | 0.093 ± 0.012    | 0.063 ± 0.0098   | 0.045 ± 0.0046    | 0.057 ± 0.01     | 0.14 ± 0.016     |
| 18:2-18:2-20:2                       | 606.8883                  | 0.0085 ± 0.0012  | 0.0056 ± 0.0013  | 0.061 ± 0.011    | 0.09 ± 0.02      | 0.017 ± 0.0024    | 0.02 ± 0.0039    | 0.1 ± 0.013      |
| 18:2-18:1-20:2, 18:2-18:2-20:1 (1:1) | 607.8963                  | 0.0071 ± 0.0012  | 0.011 ± 0.0055   | 0.028 ± 0.0017   | 0.032 ± 0.0052   | 0.0078 ± 0.0009   | 0.017 ± 0.0018   | 0.046 ± 0.0029   |
| 18:1-18:1-20:2                       | 608.9043                  | 0.0066 ± 0.0022  | 0.0092 ± 0.0029  | 0.012 ± 0.0013   | 0.014 ± 0.00097  | 0.0075 ± 0.0013   | 0.013 ± 0.0034   | 0.019 ± 0.00015  |
| 18:2-18:2-22:6                       | 616.8723                  | 0.0095 ± 0.00079 | 0.011 ± 0.0033   | 0.21 ± 0.02      | 0.017 ± 0.0018   | 0.015 ± 0.0026    | 0.045 ± 0.019    | 0.096 ± 0.014    |
| 18:2-18:1-22:6                       | 617.8803                  | 0.0067 ± 0.0011  | 0.0052 ± 0.00093 | 0.1 ± 0.01       | 0.0088 ± 0.0007  | 0.0069 ± 0.0011   | 0.02 ± 0.0073    | 0.053 ± 0.0075   |
| 18:2-18:1-22:5                       | 618.8883                  | 0.0042 ± 0.00023 | 0.0039 ± 0.00086 | 0.032 ± 0.0028   | 0.008 ± 0.001    | 0.009 ± 0.00088   | 0.014 ± 0.0023   | 0.026 ± 0.0031   |
| 62:3                                 | 658.9492                  | 0.0039 ± 0.00047 | 0.0052 ± 0.00084 | 0.0076 ± 0.0022  | 0.0035 ± 0.00055 | 0.0068 ± 0.00051  | 0.0088 ± 0.0023  | 0.0083 ± 0.00053 |
| 62:2                                 | 659.9570                  | 0.0027 ± 0.00025 | 0.0038 ± 0.0007  | 0.0039 ± 0.00067 | 0.0039 ± 0.00074 | 0.0048 ± 0.0012   | 0.0044 ± 0.00073 | 0.0051 ± 0.00089 |
| 64:5                                 | 670.9492                  | 0.0059 ± 0.001   | 0.0095 ± 0.0021  | 0.013 ± 0.0028   | 0.0055 ± 0.0019  | 0.0093 ± 0.000077 | 0.015 ± 0.0029   | 0.013 ± 0.0017   |
| 64:3                                 | 672.9648                  | 0.0083 ± 0.0017  | 0.0092 ± 0.0024  | 0.0071 ± 0.0019  | 0.0041 ± 0.0007  | 0.01 ± 0.0022     | 0.015 ± 0.0044   | 0.015 ± 0.00046  |
| 64:2                                 | 673.9726                  | 0.0058 ± 0.00052 | 0.0043 ± 0.00066 | 0.0047 ± 0.0021  | 0.0033 ± 0.0012  | 0.0043 ± 0.00064  | 0.01 ± 0.0017    | 0.012 ± 0.0012   |
| 64:1                                 | 674.9805                  | 0.0054 ± 0.00068 | 0.0095 ± 0.00085 | 0.0078 ± 0.0025  | 0.0057 ± 0.0006  | 0.0089 ± 0.0011   | 0.014 ± 0.0031   | 0.013 ± 0.0017   |
| 66:6                                 | 683.9570                  | 0.0062 ± 0.0012  | 0.0056 ± 0.0013  | 0.014 ± 0.0034   | 0.0068 ± 0.0011  | 0.0088 ± 0.00022  | 0.011 ± 0.0007   | 0.015 ± 0.001    |
| 66:5                                 | 684.9648                  | 0.014 ± 0.0045   | 0.018 ± 0.0028   | 0.014 ± 0.0032   | 0.0093 ± 0.001   | 0.015 ± 0.0016    | 0.025 ± 0.0025   | 0.023 ± 0.0012   |
| 66:4                                 | 685.9726                  | 0.017 ± 0.0043   | 0.0084 ± 0.00049 | 0.023 ± 0.004    | 0.023 ± 0.00015  | 0.019 ± 0.0018    | 0.03 ± 0.0019    | 0.04 ± 0.00096   |
| 66:3                                 | 686.9805                  | 0.025 ± 0.0038   | 0.026 ± 0.0055   | 0.034 ± 0.0065   | 0.034 ± 0.0028   | 0.031 ± 0.0017    | 0.052 ± 0.0047   | 0.051 ± 0.0019   |

|                                                               |          |                  |                  |                |                  |                  |                 |                |
|---------------------------------------------------------------|----------|------------------|------------------|----------------|------------------|------------------|-----------------|----------------|
| 66:2                                                          | 687.9883 | 0.014 ± 0.0026   | 0.013 ± 0.0019   | 0.024 ± 0.0036 | 0.022 ± 0.0023   | 0.02 ± 0.0022    | 0.034 ± 0.0035  | 0.037 ± 0.0011 |
| 66:1                                                          | 688.9961 | 0.012 ± 0.0029   | 0.029 ± 0.0036   | 0.015 ± 0.0029 | 0.011 ± 0.00091  | 0.015 ± 0.001    | 0.028 ± 0.0042  | 0.023 ± 0.0015 |
| 68:8                                                          | 695.9570 | 0.0067 ± 0.0015  | 0.0095 ± 0.0014  | 0.013 ± 0.0034 | 0.0092 ± 0.0014  | 0.0094 ± 0.002   | 0.012 ± 0.00074 | 0.016 ± 0.0024 |
| 68:7                                                          | 696.9648 | 0.015 ± 0.0043   | 0.037 ± 0.0092   | 0.021 ± 0.0018 | 0.0072 ± 0.0015  | 0.018 ± 0.0029   | 0.03 ± 0.0048   | 0.022 ± 0.0026 |
| 68:6                                                          | 697.9726 | 0.037 ± 0.0091   | 0.018 ± 0.0034   | 0.046 ± 0.013  | 0.011 ± 0.0015   | 0.052 ± 0.0029   | 0.042 ± 0.0076  | 0.089 ± 0.0013 |
| 68:5                                                          | 698.9805 | 0.052 ± 0.0096   | 0.019 ± 0.0033   | 0.058 ± 0.015  | 0.013 ± 0.0017   | 0.054 ± 0.0015   | 0.064 ± 0.0083  | 0.086 ± 0.0043 |
| 18:1-18:1-16:1-16:1                                           | 699.9883 | 0.096 ± 0.015    | 0.016 ± 0.004    | 0.047 ± 0.014  | 0.012 ± 0.00055  | 0.039 ± 0.0012   | 0.057 ± 0.011   | 0.074 ± 0.0013 |
| 18:1-18:1-16:0-16:1, 18:2-18:1-16:0-16:0, 18:2-18:0-16:1-16:0 | 700.9961 | 0.11 ± 0.023     | 0.032 ± 0.0065   | 0.054 ± 0.0074 | 0.025 ± 0.0031   | 0.054 ± 0.0021   | 0.073 ± 0.012   | 0.1 ± 0.0042   |
| 18:1-18:1-16:0-16:0, 18:2-18:0-16:0-16:0, 18:1-18:0-16:0-16:1 | 702.0039 | 0.05 ± 0.0069    | 0.019 ± 0.0039   | 0.039 ± 0.0041 | 0.021 ± 0.003    | 0.033 ± 0.00072  | 0.053 ± 0.0058  | 0.072 ± 0.001  |
| 68:1                                                          | 703.0118 | 0.045 ± 0.015    | 0.19 ± 0.048     | 0.022 ± 0.0034 | 0.017 ± 0.0019   | 0.038 ± 0.015    | 0.072 ± 0.029   | 0.03 ± 0.00086 |
| 68:0                                                          | 704.0196 | 0.014 ± 0.0042   | 0.044 ± 0.01     | 0.017 ± 0.0035 | 0.0067 ± 0.0012  | 0.011 ± 0.0009   | 0.027 ± 0.0092  | 0.015 ± 0.0003 |
| 70:13                                                         | 704.9335 | 0.0058 ± 0.0012  | 0.0077 ± 0.00041 | 0.012 ± 0.0024 | 0.0068 ± 0.00033 | 0.0078 ± 0.0007  | 0.013 ± 0.0021  | 0.014 ± 0.0016 |
| 70:12                                                         | 705.9413 | 0.0061 ± 0.0013  | 0.0082 ± 0.002   | 0.014 ± 0.0023 | 0.0067 ± 0.00031 | 0.008 ± 0.00093  | 0.013 ± 0.0027  | 0.017 ± 0.0017 |
| 70:11                                                         | 706.9492 | 0.007 ± 0.0011   | 0.0084 ± 0.0022  | 0.012 ± 0.003  | 0.0051 ± 0.00072 | 0.0076 ± 0.00049 | 0.013 ± 0.0002  | 0.013 ± 0.0023 |
| 70:10                                                         | 707.9570 | 0.0053 ± 0.0012  | 0.0041 ± 0.00033 | 0.011 ± 0.0021 | 0.0049 ± 0.00063 | 0.0063 ± 0.0016  | 0.0088 ± 0.0011 | 0.018 ± 0.0015 |
| 70:9                                                          | 708.9648 | 0.007 ± 0.0013   | 0.011 ± 0.0015   | 0.014 ± 0.0021 | 0.0088 ± 0.00097 | 0.012 ± 0.0015   | 0.021 ± 0.001   | 0.019 ± 0.003  |
| 70:8                                                          | 709.9726 | 0.012 ± 0.003    | 0.0099 ± 0.0019  | 0.031 ± 0.0075 | 0.0084 ± 0.0011  | 0.028 ± 0.0012   | 0.029 ± 0.0061  | 0.044 ± 0.0026 |
| 18:2-18:2-18:2-16:1                                           | 710.9805 | 0.15 ± 0.031     | 0.052 ± 0.0049   | 0.27 ± 0.084   | 0.041 ± 0.0033   | 0.31 ± 0.015     | 0.16 ± 0.046    | 0.26 ± 0.012   |
| 18:2-18:2-18:1-16:1, 18:2-18:2-18:2-16:0 (1:1)                | 711.9883 | 0.27 ± 0.057     | 0.05 ± 0.013     | 0.33 ± 0.099   | 0.037 ± 0.0058   | 0.21 ± 0.012     | 0.18 ± 0.051    | 0.3 ± 0.0009   |
| 18:2-18:1-18:1-16:1, 18:2-18:2-18:1-16:0 (1:1)                | 712.9961 | 0.27 ± 0.055     | 0.046 ± 0.014    | 0.23 ± 0.045   | 0.039 ± 0.0076   | 0.12 ± 0.0045    | 0.19 ± 0.042    | 0.28 ± 0.0036  |
| 18:2-18:1-18:1-16:0                                           | 714.0039 | 0.14 ± 0.023     | 0.026 ± 0.0057   | 0.14 ± 0.02    | 0.036 ± 0.0057   | 0.058 ± 0.0053   | 0.12 ± 0.021    | 0.18 ± 0.0048  |
| 70:3                                                          | 715.0118 | 0.056 ± 0.011    | 0.038 ± 0.0061   | 0.062 ± 0.0099 | 0.028 ± 0.0026   | 0.044 ± 0.0063   | 0.082 ± 0.009   | 0.082 ± 0.0043 |
| 70:2                                                          | 716.0196 | 0.019 ± 0.0026   | 0.014 ± 0.00069  | 0.021 ± 0.0044 | 0.016 ± 0.00023  | 0.016 ± 0.0017   | 0.027 ± 0.0017  | 0.034 ± 0.0027 |
| 70:1                                                          | 717.0274 | 0.015 ± 0.0024   | 0.027 ± 0.005    | 0.028 ± 0.0063 | 0.018 ± 0.0014   | 0.023 ± 0.0026   | 0.039 ± 0.00063 | 0.036 ± 0.0023 |
| 70:0                                                          | 718.0352 | 0.012 ± 0.0021   | 0.013 ± 0.0027   | 0.032 ± 0.0096 | 0.011 ± 0.0027   | 0.016 ± 0.0017   | 0.021 ± 0.0018  | 0.03 ± 0.0013  |
| 72:13                                                         | 718.9492 | 0.0064 ± 0.00099 | 0.0082 ± 0.002   | 0.014 ± 0.0031 | 0.008 ± 0.0003   | 0.0079 ± 0.00036 | 0.015 ± 0.0003  | 0.015 ± 0.001  |
| 72:12                                                         | 719.9857 | 0.014 ± 0.0028   | 0.0098 ± 0.0016  | 0.02 ± 0.0033  | 0.0096 ± 0.0011  | 0.012 ± 0.00079  | 0.02 ± 0.00023  | 0.024 ± 0.0024 |
| 72:11                                                         | 720.9648 | 0.007 ± 0.0013   | 0.012 ± 0.0024   | 0.016 ± 0.0035 | 0.01 ± 0.00093   | 0.012 ± 0.0012   | 0.023 ± 0.0038  | 0.022 ± 0.0019 |
| 72:10                                                         | 721.9726 | 0.0074 ± 0.0016  | 0.0067 ± 0.0017  | 0.025 ± 0.0057 | 0.01 ± 0.0014    | 0.016 ± 0.0018   | 0.027 ± 0.0059  | 0.042 ± 0.0019 |
| 18:3-18:2-18:2-18:2                                           | 722.9805 | 0.056 ± 0.0087   | 0.024 ± 0.0039   | 0.19 ± 0.047   | 0.046 ± 0.0036   | 0.12 ± 0.012     | 0.091 ± 0.017   | 0.18 ± 0.004   |

|                                                                       |          |                  |                  |                |                  |                  |                 |                 |
|-----------------------------------------------------------------------|----------|------------------|------------------|----------------|------------------|------------------|-----------------|-----------------|
| 18:2-18:2-18:2-18:2                                                   | 723.9883 | 1.6 ± 0.37       | 0.32 ± 0.052     | 7.4 ± 2.1      | 1.2 ± 0.13       | 2.6 ± 0.27       | 1.2 ± 0.47      | 3.7 ± 0.19      |
| 18:2-18:2-18:2-18:1                                                   | 724.9961 | 1.4 ± 0.33       | 0.24 ± 0.054     | 4.8 ± 1.3      | 0.68 ± 0.091     | 1.5 ± 0.13       | 0.94 ± 0.34     | 3.3 ± 0.1       |
| 18:2-18:2-18:1-18:1                                                   | 726.0039 | 0.59 ± 0.13      | 0.1 ± 0.024      | 1.7 ± 0.33     | 0.28 ± 0.028     | 0.44 ± 0.034     | 0.49 ± 0.15     | 1.5 ± 0.029     |
| 18:2-18:1-18:1-18:1                                                   | 727.0118 | 0.16 ± 0.033     | 0.033 ± 0.0041   | 0.36 ± 0.064   | 0.072 ± 0.0064   | 0.086 ± 0.007    | 0.16 ± 0.03     | 0.37 ± 0.0044   |
| 18:2-18:1-18:1-18:0                                                   | 728.0196 | 0.037 ± 0.0056   | 0.014 ± 0.0018   | 0.085 ± 0.017  | 0.02 ± 0.0013    | 0.039 ± 0.013    | 0.052 ± 0.008   | 0.076 ± 0.0012  |
| 72:3                                                                  | 729.0274 | 0.016 ± 0.0015   | 0.02 ± 0.0046    | 0.037 ± 0.0064 | 0.013 ± 0.0024   | 0.019 ± 0.0039   | 0.029 ± 0.0031  | 0.052 ± 0.0016  |
| 72:2                                                                  | 730.0352 | 0.0061 ± 0.00039 | 0.0085 ± 0.0017  | 0.02 ± 0.0046  | 0.0074 ± 0.0019  | 0.0081 ± 0.0014  | 0.015 ± 0.00092 | 0.028 ± 0.0014  |
| 72:1                                                                  | 730.9779 | 0.017 ± 0.0016   | 0.019 ± 0.0026   | 0.043 ± 0.0066 | 0.015 ± 0.0023   | 0.018 ± 0.00083  | 0.026 ± 0.003   | 0.052 ± 0.0077  |
| 72:0                                                                  | 731.9857 | 0.032 ± 0.0048   | 0.019 ± 0.0017   | 0.072 ± 0.013  | 0.019 ± 0.0011   | 0.025 ± 0.0042   | 0.034 ± 0.0052  | 0.084 ± 0.0078  |
| 74:13                                                                 | 732.9648 | 0.015 ± 0.0028   | 0.016 ± 0.0015   | 0.029 ± 0.0065 | 0.017 ± 0.003    | 0.018 ± 0.0011   | 0.03 ± 0.0029   | 0.035 ± 0.0027  |
| 74:12                                                                 | 733.9726 | 0.0086 ± 0.002   | 0.012 ± 0.00066  | 0.024 ± 0.0054 | 0.01 ± 0.0014    | 0.011 ± 0.00013  | 0.023 ± 0.0042  | 0.03 ± 0.0041   |
| 18:2-18:2-16:1-22:6                                                   | 734.9805 | 0.017 ± 0.0029   | 0.013 ± 0.0008   | 0.12 ± 0.02    | 0.017 ± 0.00096  | 0.035 ± 0.0034   | 0.1 ± 0.023     | 0.11 ± 0.012    |
| 18:2-18:2-18:2-20:4, 18:2-18:1-16:1-22:6, 18:2-18:2-16:0-22:6 (2:2:1) | 735.9883 | 0.059 ± 0.011    | 0.021 ± 0.0027   | 0.41 ± 0.091   | 0.074 ± 0.0057   | 0.1 ± 0.0058     | 0.18 ± 0.046    | 0.51 ± 0.019    |
| 18:2-18:2-18:2-20:3                                                   | 736.9961 | 0.1 ± 0.02       | 0.04 ± 0.005     | 1.1 ± 0.24     | 0.16 ± 0.015     | 0.27 ± 0.025     | 0.24 ± 0.066    | 1.2 ± 0.023     |
| 18:2-18:2-18:1-20:3                                                   | 738.0039 | 0.11 ± 0.023     | 0.033 ± 0.006    | 1.2 ± 0.23     | 0.34 ± 0.023     | 0.27 ± 0.03      | 0.25 ± 0.072    | 1.4 ± 0.037     |
| 18:1-18:2-18:2-20:2                                                   | 739.0118 | 0.079 ± 0.014    | 0.034 ± 0.0056   | 0.65 ± 0.14    | 0.19 ± 0.0084    | 0.14 ± 0.025     | 0.2 ± 0.048     | 0.8 ± 0.025     |
| 18:1-18:2-18:2-20:1, 18:1-18:1-18:2-20:2 (1:1)                        | 740.0196 | 0.035 ± 0.0074   | 0.017 ± 0.0034   | 0.19 ± 0.036   | 0.049 ± 0.003    | 0.042 ± 0.0086   | 0.072 ± 0.018   | 0.21 ± 0.0089   |
| 18:1-18:1-18:2-20:1, 18:1-18:1-18:0-20:3 (2:1)                        | 741.0274 | 0.018 ± 0.0032   | 0.014 ± 0.0023   | 0.064 ± 0.014  | 0.017 ± 0.0017   | 0.016 ± 0.00058  | 0.029 ± 0.00058 | 0.052 ± 0.0029  |
| 74:4                                                                  | 742.0352 | 0.008 ± 0.0019   | 0.0074 ± 0.0011  | 0.044 ± 0.0069 | 0.011 ± 0.0021   | 0.0091 ± 0.00021 | 0.018 ± 0.0007  | 0.023 ± 0.0015  |
| 74:3                                                                  | 743.0431 | 0.0094 ± 0.0012  | 0.012 ± 0.0036   | 0.035 ± 0.0098 | 0.012 ± 0.0017   | 0.013 ± 0.001    | 0.022 ± 0.0033  | 0.023 ± 0.0021  |
| 74:2                                                                  | 743.9857 | 0.006 ± 0.0022   | 0.0072 ± 0.0011  | 0.021 ± 0.0038 | 0.012 ± 0.00095  | 0.009 ± 0.00084  | 0.02 ± 0.0015   | 0.026 ± 0.0039  |
| 74:1                                                                  | 744.0509 | 0.0053 ± 0.00055 | 0.0066 ± 0.00046 | 0.015 ± 0.0045 | 0.0099 ± 0.0015  | 0.0098 ± 0.0019  | 0.016 ± 0.0032  | 0.017 ± 0.00092 |
| 76:15                                                                 | 744.9648 | 0.013 ± 0.0027   | 0.018 ± 0.003    | 0.021 ± 0.0032 | 0.02 ± 0.00059   | 0.017 ± 0.0023   | 0.02 ± 0.0032   | 0.034 ± 0.0022  |
| 76:14                                                                 | 745.9726 | 0.0078 ± 0.00091 | 0.0091 ± 0.0016  | 0.02 ± 0.0019  | 0.0093 ± 0.00031 | 0.0093 ± 0.0012  | 0.021 ± 0.0041  | 0.028 ± 0.0019  |
| 76:13                                                                 | 746.9805 | 0.013 ± 0.0029   | 0.012 ± 0.0022   | 0.086 ± 0.019  | 0.012 ± 0.0019   | 0.016 ± 0.00074  | 0.043 ± 0.0063  | 0.053 ± 0.0023  |
| 18:2-18:2-18:2-22:6                                                   | 747.9883 | 0.099 ± 0.0043   | 0.031 ± 0.0063   | 3.1 ± 0.64     | 0.078 ± 0.013    | 0.12 ± 0.0042    | 0.53 ± 0.2      | 0.92 ± 0.067    |
| 18:2-18:2-18:2-22:5, 18:1-18:2-18:2-22:6 (1:1)                        | 748.9961 | 0.077 ± 0.0087   | 0.028 ± 0.0054   | 1.9 ± 0.33     | 0.074 ± 0.021    | 0.098 ± 0.0072   | 0.51 ± 0.16     | 0.75 ± 0.044    |
| 18:2-18:2-18:1-22:5, 18:2-18:1-18:1-22:6 (2:1)                        | 750.0039 | 0.032 ± 0.0039   | 0.015 ± 0.0022   | 0.62 ± 0.087   | 0.043 ± 0.0033   | 0.049 ± 0.0064   | 0.2 ± 0.054     | 0.31 ± 0.008    |
| 18:2-18:1-20:3-20:4                                                   | 751.0118 | 0.02 ± 0.0038    | 0.018 ± 0.0027   | 0.19 ± 0.031   | 0.037 ± 0.0066   | 0.038 ± 0.0069   | 0.086 ± 0.02    | 0.22 ± 0.0017   |
| 76:8                                                                  | 752.0196 | 0.01 ± 0.0025    | 0.012 ± 0.002    | 0.086 ± 0.014  | 0.043 ± 0.0048   | 0.018 ± 0.003    | 0.046 ± 0.008   | 0.12 ± 0.0022   |

|                                                |          |                  |                  |                  |                  |                  |                 |                 |
|------------------------------------------------|----------|------------------|------------------|------------------|------------------|------------------|-----------------|-----------------|
| 76:7                                           | 753.0274 | 0.009 ± 0.00091  | 0.012 ± 0.002    | 0.043 ± 0.0079   | 0.016 ± 0.0016   | 0.016 ± 0.0043   | 0.027 ± 0.0018  | 0.064 ± 0.0017  |
| 76:6                                           | 754.0352 | 0.0066 ± 0.00087 | 0.013 ± 0.0025   | 0.021 ± 0.0033   | 0.01 ± 0.00065   | 0.011 ± 0.0012   | 0.015 ± 0.0038  | 0.026 ± 0.00039 |
| 76:5                                           | 755.0431 | 0.0065 ± 0.00095 | 0.014 ± 0.0031   | 0.016 ± 0.0026   | 0.0039 ± 0.001   | 0.012 ± 0.0002   | 0.02 ± 0.0024   | 0.017 ± 0.002   |
| 76:4                                           | 756.0509 | 0.0031 ± 0.00059 | 0.0063 ± 0.0016  | 0.016 ± 0.0031   | 0.0054 ± 0.00024 | 0.0065 ± 0.00065 | 0.012 ± 0.0019  | 0.01 ± 0.00082  |
| 76:3                                           | 756.9648 | 0.0066 ± 0.00071 | 0.0088 ± 0.0022  | 0.016 ± 0.00093  | 0.0049 ± 0.001   | 0.011 ± 0.0016   | 0.015 ± 0.0024  | 0.016 ± 0.003   |
| 76:2                                           | 758.0014 | 0.0062 ± 0.0015  | 0.0053 ± 0.00054 | 0.013 ± 0.0032   | 0.005 ± 0.00048  | 0.0062 ± 0.00089 | 0.014 ± 0.0025  | 0.018 ± 0.0012  |
| 18:2-18:3-20:4-22:6                            | 758.9805 | 0.0052 ± 0.0005  | 0.0071 ± 0.00021 | 0.024 ± 0.0038   | 0.0063 ± 0.0011  | 0.0064 ± 0.001   | 0.034 ± 0.0049  | 0.02 ± 0.0019   |
| 18:2-18:2-20:4-22:6, 18:2-20:4-20:4-20:4 (1:1) | 759.9883 | 0.0064 ± 0.00077 | 0.0061 ± 0.00052 | 0.1 ± 0.0071     | 0.0098 ± 0.0017  | 0.01 ± 0.0018    | 0.038 ± 0.0088  | 0.058 ± 0.0039  |
| 18:2-18:2-20:3-22:6                            | 760.9961 | 0.014 ± 0.0011   | 0.015 ± 0.0034   | 0.33 ± 0.048     | 0.019 ± 0.0043   | 0.019 ± 0.00032  | 0.081 ± 0.019   | 0.14 ± 0.0043   |
| 18:2-18:2-20:3-22:6, 18:1-18:2-20:2-22:6 (1:1) | 762.0039 | 0.014 ± 0.00065  | 0.012 ± 0.00076  | 0.34 ± 0.038     | 0.024 ± 0.0055   | 0.027 ± 0.0028   | 0.11 ± 0.031    | 0.16 ± 0.0084   |
| 18:2-18:2-20:2-22:6, 18:1-18:2-20:1-22:6 (1:1) | 763.0118 | 0.016 ± 0.0036   | 0.022 ± 0.0039   | 0.17 ± 0.016     | 0.018 ± 0.0033   | 0.027 ± 0.0024   | 0.071 ± 0.016   | 0.091 ± 0.0048  |
| 78:10                                          | 764.0196 | 0.01 ± 0.0031    | 0.012 ± 0.0025   | 0.059 ± 0.0065   | 0.0083 ± 0.0011  | 0.015 ± 0.001    | 0.027 ± 0.0034  | 0.043 ± 0.00091 |
| 78:9                                           | 765.0274 | 0.0089 ± 0.0019  | 0.011 ± 0.002    | 0.026 ± 0.0046   | 0.011 ± 0.00097  | 0.015 ± 0.0029   | 0.022 ± 0.0014  | 0.03 ± 0.0017   |
| 78:8                                           | 766.0352 | 0.0077 ± 0.0011  | 0.0065 ± 0.00075 | 0.013 ± 0.0023   | 0.0087 ± 0.00018 | 0.0092 ± 0.0012  | 0.0095 ± 0.0015 | 0.023 ± 0.0015  |
| 78:7                                           | 767.0431 | 0.0097 ± 0.0022  | 0.0093 ± 0.0013  | 0.017 ± 0.0038   | 0.013 ± 0.0011   | 0.018 ± 0.0012   | 0.018 ± 0.0025  | 0.032 ± 0.0015  |
| 78:6                                           | 768.0509 | 0.0077 ± 0.00089 | 0.0092 ± 0.0008  | 0.011 ± 0.0028   | 0.0087 ± 0.0006  | 0.013 ± 0.0012   | 0.016 ± 0.0018  | 0.021 ± 0.0014  |
| 78:5                                           | 768.9648 | 0.0057 ± 0.0016  | 0.0088 ± 0.0012  | 0.015 ± 0.0024   | 0.0075 ± 0.0011  | 0.0082 ± 0.00083 | 0.013 ± 0.0014  | 0.017 ± 0.0011  |
| 78:4                                           | 769.9726 | 0.0043 ± 0.00086 | 0.0055 ± 0.00023 | 0.0094 ± 0.00032 | 0.0059 ± 0.001   | 0.0073 ± 0.0012  | 0.0093 ± 0.0014 | 0.015 ± 0.0016  |
| 80:17                                          | 770.9805 | 0.0073 ± 0.0012  | 0.012 ± 0.0018   | 0.025 ± 0.0033   | 0.0064 ± 0.0006  | 0.0089 ± 0.00053 | 0.02 ± 0.0011   | 0.02 ± 0.00086  |
| 18:2-18:2-22:6-22:6                            | 771.9883 | 0.017 ± 0.0026   | 0.0088 ± 0.0016  | 0.71 ± 0.094     | 0.014 ± 0.0036   | 0.011 ± 0.00091  | 0.11 ± 0.031    | 0.084 ± 0.0014  |
| 18:2-18:1-22:6-22:6                            | 772.9961 | 0.016 ± 0.00083  | 0.019 ± 0.0038   | 0.31 ± 0.032     | 0.018 ± 0.0029   | 0.023 ± 0.00043  | 0.09 ± 0.022    | 0.062 ± 0.0076  |
| 18:2-18:0-22:6-22:6                            | 774.0039 | 0.014 ± 0.0019   | 0.014 ± 0.0022   | 0.097 ± 0.016    | 0.019 ± 0.0011   | 0.02 ± 0.0018    | 0.053 ± 0.0067  | 0.038 ± 0.0023  |
| 80:13                                          | 775.0118 | 0.017 ± 0.0031   | 0.026 ± 0.0047   | 0.046 ± 0.008    | 0.021 ± 0.0023   | 0.024 ± 0.0023   | 0.045 ± 0.0034  | 0.039 ± 0.0029  |
| 80:12                                          | 776.0196 | 0.011 ± 0.0015   | 0.017 ± 0.0027   | 0.026 ± 0.0025   | 0.015 ± 0.00065  | 0.015 ± 0.00053  | 0.03 ± 0.0026   | 0.032 ± 0.0019  |
| 80:11                                          | 777.0274 | 0.013 ± 0.0016   | 0.021 ± 0.0043   | 0.024 ± 0.0047   | 0.014 ± 0.0014   | 0.019 ± 0.0013   | 0.032 ± 0.0029  | 0.029 ± 0.003   |
| 80:10                                          | 778.0352 | 0.0069 ± 0.0014  | 0.012 ± 0.0014   | 0.015 ± 0.0032   | 0.0085 ± 0.0013  | 0.011 ± 0.0009   | 0.017 ± 0.00082 | 0.016 ± 0.0017  |
| 80:9                                           | 779.0431 | 0.0072 ± 0.0011  | 0.021 ± 0.0058   | 0.011 ± 0.0021   | 0.0086 ± 0.00026 | 0.011 ± 0.0012   | 0.022 ± 0.0033  | 0.016 ± 0.0024  |
| 80:8                                           | 780.0509 | 0.0047 ± 0.0011  | 0.0079 ± 0.0019  | 0.0093 ± 0.0023  | 0.0057 ± 0.00095 | 0.0063 ± 0.00073 | 0.0098 ± 0.001  | 0.011 ± 0.0017  |
| 80:7                                           | 781.0587 | 0.007 ± 0.0022   | 0.014 ± 0.0042   | 0.013 ± 0.0035   | 0.0098 ± 0.001   | 0.012 ± 0.0013   | 0.02 ± 0.0025   | 0.017 ± 0.00073 |
| 80:6                                           | 782.0665 | 0.0044 ± 0.00064 | 0.0067 ± 0.0015  | 0.0098 ± 0.0031  | 0.0073 ± 0.0026  | 0.0097 ± 0.0021  | 0.011 ± 0.0026  | 0.013 ± 0.0019  |

|                                                |          |                  |                  |                  |                  |                  |                  |                  |
|------------------------------------------------|----------|------------------|------------------|------------------|------------------|------------------|------------------|------------------|
| 80:5                                           | 783.0092 | 0.0064 ± 0.0015  | 0.012 ± 0.0041   | 0.012 ± 0.0023   | 0.0077 ± 0.0014  | 0.0071 ± 0.0014  | 0.015 ± 0.0012   | 0.015 ± 0.0012   |
| 18:2-20:4-22:6-22:6                            | 783.9883 | 0.004 ± 0.00098  | 0.0059 ± 0.00097 | 0.017 ± 0.00054  | 0.0051 ± 0.00063 | 0.0046 ± 0.0013  | 0.01 ± 0.0012    | 0.01 ± 0.0012    |
| 18:2-20:3-22:6-22:6                            | 784.9961 | 0.0091 ± 0.0027  | 0.033 ± 0.0067   | 0.046 ± 0.0026   | 0.0056 ± 0.0011  | 0.013 ± 0.0036   | 0.028 ± 0.0071   | 0.015 ± 0.0012   |
| 18:2-20:2-22:6-22:6                            | 786.0039 | 0.004 ± 0.00033  | 0.012 ± 0.0027   | 0.034 ± 0.0017   | 0.0046 ± 0.00075 | 0.0079 ± 0.0011  | 0.02 ± 0.0018    | 0.011 ± 0.0013   |
| 82:15                                          | 787.0118 | 0.0064 ± 0.00098 | 0.011 ± 0.0014   | 0.026 ± 0.0021   | 0.0056 ± 0.0013  | 0.0093 ± 0.0011  | 0.02 ± 0.00066   | 0.017 ± 0.0017   |
| 82:14                                          | 788.0196 | 0.0082 ± 0.0013  | 0.0076 ± 0.00048 | 0.021 ± 0.0014   | 0.0068 ± 0.00083 | 0.0095 ± 0.001   | 0.014 ± 0.0013   | 0.015 ± 0.0011   |
| 82:13                                          | 789.0274 | 0.013 ± 0.0025   | 0.018 ± 0.0036   | 0.021 ± 0.0035   | 0.013 ± 0.0022   | 0.016 ± 0.0015   | 0.027 ± 0.0014   | 0.026 ± 0.0024   |
| 82:12                                          | 790.0352 | 0.0086 ± 0.0012  | 0.01 ± 0.001     | 0.024 ± 0.0048   | 0.0091 ± 0.0015  | 0.013 ± 0.001    | 0.025 ± 0.0028   | 0.021 ± 0.0013   |
| 82:11                                          | 791.0431 | 0.02 ± 0.0056    | 0.039 ± 0.0042   | 0.032 ± 0.0046   | 0.017 ± 0.00085  | 0.025 ± 0.0025   | 0.046 ± 0.0057   | 0.03 ± 0.0019    |
| 82:10                                          | 791.9570 | 0.0049 ± 0.0011  | 0.005 ± 0.001    | 0.011 ± 0.0028   | 0.0074 ± 0.0008  | 0.0089 ± 0.001   | 0.0091 ± 0.00065 | 0.012 ± 0.0013   |
| 82:9                                           | 792.9648 | 0.0059 ± 0.002   | 0.0072 ± 0.0022  | 0.011 ± 0.0029   | 0.0097 ± 0.0013  | 0.0084 ± 0.0015  | 0.011 ± 0.00074  | 0.015 ± 0.0013   |
| 82:8                                           | 793.9726 | 0.0042 ± 0.0015  | 0.0059 ± 0.0013  | 0.0056 ± 0.0011  | 0.0078 ± 0.001   | 0.0059 ± 0.0014  | 0.0086 ± 0.00098 | 0.012 ± 0.00077  |
| 84:21                                          | 794.9805 | 0.011 ± 0.002    | 0.017 ± 0.0036   | 0.019 ± 0.0055   | 0.016 ± 0.0016   | 0.014 ± 0.00029  | 0.017 ± 0.0016   | 0.021 ± 0.00052  |
| 20:4-20:4-22:6-22:6, 18:2-22:6-22:6-22:6 (1:1) | 795.9883 | 0.0049 ± 0.00046 | 0.0066 ± 0.00046 | 0.061 ± 0.0052   | 0.0089 ± 0.001   | 0.0075 ± 0.00069 | 0.015 ± 0.0022   | 0.014 ± 0.0008   |
| 20:4-20:4-22:6-22:5, 18:2-22:6-22:6-22:5 (1:1) | 796.9961 | 0.0061 ± 0.00017 | 0.01 ± 0.001     | 0.033 ± 0.0024   | 0.0092 ± 0.00048 | 0.013 ± 0.001    | 0.018 ± 0.0016   | 0.014 ± 0.0019   |
| 20:4-20:3-22:6-22:5                            | 798.0039 | 0.0054 ± 0.00018 | 0.006 ± 0.0011   | 0.014 ± 0.0016   | 0.0064 ± 0.00015 | 0.0066 ± 0.0014  | 0.013 ± 0.0023   | 0.011 ± 0.00031  |
| 84:17                                          | 799.0118 | 0.0054 ± 0.00076 | 0.0099 ± 0.0012  | 0.011 ± 0.0018   | 0.0076 ± 0.0011  | 0.007 ± 0.00072  | 0.016 ± 0.0017   | 0.015 ± 0.0011   |
| 84:16                                          | 800.0196 | 0.0044 ± 0.0006  | 0.0073 ± 0.001   | 0.0076 ± 0.0015  | 0.0052 ± 0.00076 | 0.004 ± 0.00088  | 0.0061 ± 0.0023  | 0.0096 ± 0.00081 |
| 84:15                                          | 801.0274 | 0.0081 ± 0.00077 | 0.011 ± 0.0023   | 0.0095 ± 0.0019  | 0.0076 ± 0.0022  | 0.012 ± 0.00048  | 0.016 ± 0.0026   | 0.013 ± 0.0016   |
| 84:14                                          | 802.0352 | 0.0039 ± 0.00095 | 0.0063 ± 0.00087 | 0.0067 ± 0.0018  | 0.0048 ± 0.0011  | 0.0056 ± 0.00071 | 0.0091 ± 0.00096 | 0.0095 ± 0.0017  |
| 84:13                                          | 803.0431 | 0.0061 ± 0.00025 | 0.01 ± 0.002     | 0.011 ± 0.0018   | 0.0071 ± 0.0015  | 0.012 ± 0.0012   | 0.016 ± 0.0044   | 0.015 ± 0.00075  |
| 84:12                                          | 804.0509 | 0.0059 ± 0.00041 | 0.0078 ± 0.0015  | 0.011 ± 0.0023   | 0.0077 ± 0.00029 | 0.0089 ± 0.00052 | 0.014 ± 0.0013   | 0.012 ± 0.00056  |
| 84:11                                          | 805.0587 | 0.0094 ± 0.0015  | 0.017 ± 0.0019   | 0.016 ± 0.0026   | 0.011 ± 0.0005   | 0.016 ± 0.00063  | 0.025 ± 0.0027   | 0.019 ± 0.0025   |
| 84:10                                          | 806.0665 | 0.0085 ± 0.0011  | 0.012 ± 0.001    | 0.013 ± 0.00077  | 0.0096 ± 0.0021  | 0.013 ± 0.0011   | 0.019 ± 0.0009   | 0.019 ± 0.0024   |
| 84:9                                           | 807.0744 | 0.011 ± 0.0012   | 0.016 ± 0.0016   | 0.014 ± 0.0023   | 0.013 ± 0.00059  | 0.017 ± 0.00033  | 0.026 ± 0.0044   | 0.024 ± 0.00076  |
| 86:22                                          | 807.9883 | 0.0031 ± 0.0008  | 0.0057 ± 0.001   | 0.0057 ± 0.0016  | 0.0048 ± 0.00032 | 0.0056 ± 0.00033 | 0.0058 ± 0.0004  | 0.0081 ± 0.00087 |
| 86:21                                          | 808.9961 | 0.0054 ± 0.0021  | 0.0097 ± 0.0018  | 0.01 ± 0.0024    | 0.0058 ± 0.00096 | 0.0058 ± 0.00013 | 0.011 ± 0.0014   | 0.011 ± 0.0016   |
| 86:20                                          | 810.0039 | 0.0048 ± 0.00073 | 0.0062 ± 0.00053 | 0.0066 ± 0.00049 | 0.0052 ± 0.00088 | 0.0056 ± 0.00046 | 0.0095 ± 0.00054 | 0.012 ± 0.0029   |
| 86:19                                          | 811.0118 | 0.0064 ± 0.0013  | 0.011 ± 0.0015   | 0.011 ± 0.0024   | 0.0064 ± 0.00016 | 0.0098 ± 0.00077 | 0.015 ± 0.00052  | 0.016 ± 0.0023   |
| 86:18                                          | 812.0196 | 0.0037 ± 0.0012  | 0.0069 ± 0.00064 | 0.0072 ± 0.0014  | 0.0044 ± 0.0014  | 0.0056 ± 0.0015  | 0.0066 ± 0.0018  | 0.011 ± 0.0015   |

|       |          |                  |                  |                  |                  |                  |                  |                 |
|-------|----------|------------------|------------------|------------------|------------------|------------------|------------------|-----------------|
| 86:17 | 813.0274 | 0.0056 ± 0.00081 | 0.0088 ± 0.0023  | 0.01 ± 0.0026    | 0.007 ± 0.00058  | 0.007 ± 0.0011   | 0.013 ± 0.0017   | 0.015 ± 0.0018  |
| 86:16 | 814.0352 | 0.0042 ± 0.00043 | 0.0048 ± 0.00054 | 0.008 ± 0.0023   | 0.0061 ± 0.00013 | 0.0057 ± 0.00029 | 0.0088 ± 0.0021  | 0.011 ± 0.00079 |
| 86:15 | 815.0431 | 0.0058 ± 0.0014  | 0.0096 ± 0.0012  | 0.0078 ± 0.0026  | 0.008 ± 0.0019   | 0.0091 ± 0.0004  | 0.013 ± 0.0039   | 0.012 ± 0.0021  |
| 86:14 | 816.0509 | 0.0055 ± 0.0012  | 0.0075 ± 0.00076 | 0.0099 ± 0.0039  | 0.013 ± 0.00071  | 0.01 ± 0.001     | 0.012 ± 0.0013   | 0.012 ± 0.0024  |
| 86:13 | 817.0587 | 0.0094 ± 0.002   | 0.013 ± 0.004    | 0.012 ± 0.003    | 0.015 ± 0.00044  | 0.014 ± 0.0016   | 0.018 ± 0.0022   | 0.019 ± 0.00082 |
| 86:12 | 818.0665 | 0.006 ± 0.00071  | 0.0098 ± 0.0015  | 0.0098 ± 0.0023  | 0.012 ± 0.00048  | 0.012 ± 0.0013   | 0.014 ± 0.0015   | 0.018 ± 0.0012  |
| 86:11 | 819.0744 | 0.014 ± 0.0013   | 0.017 ± 0.0017   | 0.019 ± 0.0051   | 0.019 ± 0.0015   | 0.019 ± 0.002    | 0.028 ± 0.0024   | 0.026 ± 0.002   |
| 88:24 | 819.9883 | 0.0045 ± 0.00032 | 0.0065 ± 0.002   | 0.0093 ± 0.0022  | 0.011 ± 0.0014   | 0.0079 ± 0.0011  | 0.0097 ± 0.00055 | 0.015 ± 0.0021  |
| 88:23 | 820.9961 | 0.006 ± 0.0011   | 0.012 ± 0.0035   | 0.01 ± 0.0021    | 0.0088 ± 0.002   | 0.0096 ± 0.001   | 0.017 ± 0.00074  | 0.013 ± 0.0017  |
| 88:22 | 822.0039 | 0.0045 ± 0.00083 | 0.0054 ± 0.00077 | 0.0079 ± 0.0017  | 0.0059 ± 0.00057 | 0.0065 ± 0.00066 | 0.0083 ± 0.00055 | 0.011 ± 0.00075 |
| 88:21 | 823.0118 | 0.013 ± 0.0021   | 0.023 ± 0.0062   | 0.018 ± 0.0023   | 0.016 ± 0.0009   | 0.019 ± 0.00035  | 0.027 ± 0.0027   | 0.027 ± 0.0017  |
| 88:20 | 824.0196 | 0.0053 ± 0.00049 | 0.0072 ± 0.0014  | 0.011 ± 0.0024   | 0.0074 ± 0.0008  | 0.0078 ± 0.0012  | 0.012 ± 0.0014   | 0.012 ± 0.00071 |
| 88:19 | 825.0274 | 0.0083 ± 0.0012  | 0.0087 ± 0.0024  | 0.011 ± 0.0024   | 0.0069 ± 0.00087 | 0.0098 ± 0.00026 | 0.013 ± 0.00086  | 0.014 ± 0.00017 |
| 88:18 | 826.0352 | 0.0036 ± 0.00087 | 0.0066 ± 0.0014  | 0.0068 ± 0.00081 | 0.0057 ± 0.00052 | 0.0042 ± 0.0006  | 0.0085 ± 0.00061 | 0.013 ± 0.0017  |
| 88:17 | 827.0431 | 0.0051 ± 0.00045 | 0.01 ± 0.0022    | 0.0091 ± 0.0026  | 0.0089 ± 0.0017  | 0.009 ± 0.0012   | 0.014 ± 0.0025   | 0.016 ± 0.00082 |
| 88:16 | 828.0509 | 0.0041 ± 0.0011  | 0.0047 ± 0.00056 | 0.008 ± 0.0027   | 0.0061 ± 0.00086 | 0.0078 ± 0.00053 | 0.0095 ± 0.00062 | 0.014 ± 0.0015  |
| 90:25 | 832.9961 | 0.0053 ± 0.0011  | 0.0085 ± 0.0022  | 0.0098 ± 0.0027  | 0.0061 ± 0.0011  | 0.008 ± 0.0012   | 0.0094 ± 0.0015  | 0.011 ± 0.0016  |
| TOTAL |          | 7.068 ± 1.495    | 3.106 ± 0.583    | 30.964 ± 6.88    | 5.749 ± 0.714    | 8.812 ± 0.869    | 9.555 ± 2.508    | 21.773 ± 1.047  |

**Supplemental Table 2. Quantification of Ptd<sub>2</sub>Gro species in mouse brain**

| Ptd <sub>2</sub> Gro species         | [M-2H] <sup>2+</sup> + 0.5 | Concentration (nmol/mg protein) |
|--------------------------------------|----------------------------|---------------------------------|
| 18:2-18:2-16:1                       | 579.8653                   | 0.0022 ± 0.00023                |
| 18:2-18:2-16:0, 18:2-18:1-16:1 (3:1) | 580.8723                   | 0.0049 ± 0.00043                |
| 18:2-18:1-16:0                       | 581.8803                   | 0.0079 ± 0.0019                 |
| 18:1-18:1-16:0                       | 582.8883                   | 0.0086 ± 0.0018                 |
| 18:2-18:2-18:3                       | 591.8653                   | 0.0022 ± 0.00085                |
| 18:2-18:2-18:2                       | 592.8723                   | 0.012 ± 0.0014                  |
| 18:2-18:2-18:1                       | 593.8803                   | 0.015 ± 0.0019                  |
| 18:2-18:1-18:1                       | 594.9883                   | 0.0051 ± 0.0017                 |
| 18:2-18:1-18:0, 18:1-18:1-18:1 (1:1) | 595.8963                   | 0.019 ± 0.0031                  |
| 18:1-18:1-18:0                       | 596.9043                   | 0.0056 ± 0.00074                |
| 18:2-18:2-20:4                       | 604.8723                   | 0.008 ± 0.0014                  |
| 18:2-18:2-20:3                       | 605.8803                   | 0.02 ± 0.0031                   |
| 18:2-18:2-20:2                       | 606.8883                   | 0.018 ± 0.0026                  |
| 18:2-18:1-20:2, 18:2-18:2-20:1 (1:1) | 607.8963                   | 0.012 ± 0.0015                  |
| 18:1-18:1-20:2                       | 608.9043                   | 0.0056 ± 0.00046                |
| 18:2-18:2-22:6                       | 616.8723                   | 0.008 ± 0.00087                 |
| 18:2-18:1-22:6                       | 617.8803                   | 0.01 ± 0.0024                   |
| 18:2-18:1-22:5                       | 618.8883                   | 0.016 ± 0.00072                 |
| 62:3                                 | 658.9492                   | 0.0022 ± 0.00024                |
| 62:2                                 | 659.9570                   | 0.002 ± 0.00039                 |
| 64:5                                 | 670.9492                   | 0.003 ± 0.00024                 |
| 64:3                                 | 672.9648                   | 0.0041 ± 0.0011                 |
| 64:2                                 | 673.9726                   | 0.0022 ± 0.00049                |
| 64:1                                 | 674.9805                   | 0.0028 ± 0.00016                |
| 66:6                                 | 683.9570                   | 0.0054 ± 0.0012                 |
| 66:5                                 | 684.9648                   | 0.0067 ± 0.00045                |
| 66:4                                 | 685.9726                   | 0.01 ± 0.000075                 |
| 66:3                                 | 686.9805                   | 0.021 ± 0.0018                  |

|                                                             |          |                  |
|-------------------------------------------------------------|----------|------------------|
| 66:2                                                        | 687.9883 | 0.016 ± 0.0014   |
| 66:1                                                        | 688.9961 | 0.011 ± 0.00081  |
| 68:8                                                        | 695.9570 | 0.0056 ± 0.00035 |
| 68:7                                                        | 696.9648 | 0.0058 ± 0.00074 |
| 68:6                                                        | 697.9726 | 0.0061 ± 0.0012  |
| 68:5                                                        | 698.9805 | 0.011 ± 0.0021   |
| 18:1-18:1-16:1-16:1                                         | 699.9883 | 0.028 ± 0.0071   |
| 18:1-18:1-16:0-16:1 18:2-18:1-16:0-16:0 18:2-18:0-16:1-16:0 | 700.9961 | 0.05 ± 0.0086    |
| 18:1-18:1-16:0-16:0 18:2-18:0-16:0-16:0 18:1-18:0-16:0-16:1 | 702.0039 | 0.048 ± 0.008    |
| 68:1                                                        | 703.0118 | 0.016 ± 0.00083  |
| 68:0                                                        | 704.0196 | 0.0059 ± 0.00055 |
| 70:13                                                       | 704.9335 | 0.0039 ± 0.00059 |
| 70:12                                                       | 705.9413 | 0.0046 ± 0.00037 |
| 70:11                                                       | 706.9492 | 0.0052 ± 0.00049 |
| 70:10                                                       | 707.9570 | 0.0048 ± 0.00047 |
| 70:9                                                        | 708.9648 | 0.0049 ± 0.00077 |
| 70:8                                                        | 709.9726 | 0.0099 ± 0.001   |
| 18:2-18:2-18:2-16:1                                         | 710.9805 | 0.035 ± 0.0049   |
| 18:2-18:2-18:1-16:1, 18:2-18:2-18:2-16:0 (1:1)              | 711.9883 | 0.048 ± 0.01     |
| 18:2-18:1-18:1-16:1, 18:2-18:2-18:1-16:0 (1:1)              | 712.9961 | 0.078 ± 0.015    |
| 18:2-18:1-18:1-16:0                                         | 714.0039 | 0.14 ± 0.03      |
| 70:3                                                        | 715.0118 | 0.12 ± 0.022     |
| 70:2                                                        | 716.0196 | 0.028 ± 0.0033   |
| 70:1                                                        | 717.0274 | 0.014 ± 0.0015   |
| 70:0                                                        | 718.0352 | 0.0091 ± 0.00044 |
| 72:13                                                       | 718.9492 | 0.0056 ± 0.00024 |
| 72:12                                                       | 719.9857 | 0.013 ± 0.0023   |
| 72:11                                                       | 720.9648 | 0.012 ± 0.0012   |
| 72:10                                                       | 721.9726 | 0.021 ± 0.0033   |
| 18:3-18:2-18:2-18:2                                         | 722.9805 | 0.039 ± 0.0032   |
| 18:2-18:2-18:2-18:2                                         | 723.9883 | 0.13 ± 0.031     |



|                                                                       |          |                 |
|-----------------------------------------------------------------------|----------|-----------------|
| 18:2-18:2-18:2-18:1                                                   | 724.9961 | 0.25 ± 0.06     |
| 18:2-18:2-18:1-18:1                                                   | 726.0039 | 0.21 ± 0.046    |
| 18:2-18:1-18:1-18:1                                                   | 727.0118 | 0.21 ± 0.039    |
| 18:1-18:1-18:1-18:1                                                   | 728.0196 | 0.32 ± 0.061    |
| 72:3                                                                  | 729.0274 | 0.063 ± 0.0092  |
| 72:2                                                                  | 730.0352 | 0.014 ± 0.002   |
| 72:1                                                                  | 730.9779 | 0.014 ± 0.0014  |
| 72:0                                                                  | 731.9857 | 0.013 ± 0.0015  |
| 74:13                                                                 | 732.9648 | 0.011 ± 0.0017  |
| 74:12                                                                 | 733.9726 | 0.012 ± 0.0015  |
| 18:2-18:2-16:1-22:6                                                   | 734.9805 | 0.042 ± 0.0069  |
| 18:2-18:2-18:2-20:4, 18:2-18:1-16:1-22:6, 18:2-18:2-16:0-22:6 (2:2:1) | 735.9883 | 0.12 ± 0.023    |
| 18:2-18:2-18:2-20:3                                                   | 736.9961 | 0.21 ± 0.038    |
| 18:1-18:1-18:1-20:4                                                   | 739.0118 | 0.36 ± 0.085    |
| 18:1-18:2-18:2-20:1, 18:1-18:1-18:2-20:2 (1:1)                        | 740.0196 | 0.14 ± 0.036    |
| 18:1-18:1-18:2-20:1, 18:1-18:1-18:0-20:3 (2:1)                        | 741.0274 | 0.038 ± 0.0081  |
| 74:4                                                                  | 742.0352 | 0.017 ± 0.0018  |
| 74:3                                                                  | 743.0431 | 0.012 ± 0.0021  |
| 74:2                                                                  | 743.9857 | 0.012 ± 0.0028  |
| 74:1                                                                  | 744.0509 | 0.0086 ± 0.0006 |
| 76:15                                                                 | 744.9648 | 0.01 ± 0.00034  |
| 76:14                                                                 | 745.9726 | 0.011 ± 0.0013  |
| 76:13                                                                 | 746.9805 | 0.029 ± 0.0039  |
| 18:2-18:2-18:2-22:6                                                   | 747.9883 | 0.13 ± 0.024    |
| 18:2-18:2-18:2-22:5, 18:1-18:2-18:2-22:6 (1:1)                        | 748.9961 | 0.18 ± 0.036    |
| 18:1-18:1-20:4-20:4                                                   | 751.0118 | 0.32 ± 0.075    |
| 76:8                                                                  | 752.0196 | 0.097 ± 0.022   |
| 76:7                                                                  | 753.0274 | 0.036 ± 0.0081  |
| 76:6                                                                  | 754.0352 | 0.014 ± 0.0023  |
| 76:5                                                                  | 755.0431 | 0.011 ± 0.0016  |
| 76:4                                                                  | 756.0509 | 0.0074 ± 0.0011 |

|                                                |          |                  |
|------------------------------------------------|----------|------------------|
| 76:3                                           | 756.9648 | 0.006 ± 0.00077  |
| 76:2                                           | 758.0014 | 0.0063 ± 0.0014  |
| 18:2-18:3-20:4-22:6                            | 758.9805 | 0.021 ± 0.0025   |
| 18:2-18:2-20:4-22:6, 18:2-20:4-20:4 (1:1)      | 759.9883 | 0.068 ± 0.018    |
| 18:2-18:2-20:3-22:6                            | 760.9961 | 0.16 ± 0.035     |
| 18:2-18:2-20:2-22:6, 18:1-18:2-20:1-22:6 (1:1) | 763.0118 | 0.13 ± 0.028     |
| 78:10                                          | 764.0196 | 0.046 ± 0.0074   |
| 78:9                                           | 765.0274 | 0.026 ± 0.0073   |
| 78:8                                           | 766.0352 | 0.015 ± 0.0029   |
| 78:7                                           | 767.0431 | 0.018 ± 0.0024   |
| 78:6                                           | 768.0509 | 0.01 ± 0.0023    |
| 78:5                                           | 768.9648 | 0.006 ± 0.00042  |
| 78:4                                           | 769.9726 | 0.0044 ± 0.00058 |
| 80:17                                          | 770.9805 | 0.013 ± 0.0033   |
| 18:2-18:2-22:6-22:6                            | 771.9883 | 0.037 ± 0.0086   |
| 18:2-18:1-22:6-22:6                            | 772.9961 | 0.12 ± 0.025     |
| 18:2-18:0-22:6-22:6                            | 774.0039 | 0.2 ± 0.044      |
| 80:13                                          | 775.0118 | 0.062 ± 0.0093   |
| 80:12                                          | 776.0196 | 0.033 ± 0.0028   |
| 80:11                                          | 777.0274 | 0.02 ± 0.0013    |
| 80:10                                          | 778.0352 | 0.015 ± 0.0019   |
| 80:9                                           | 779.0431 | 0.018 ± 0.0011   |
| 80:8                                           | 780.0509 | 0.011 ± 0.00055  |
| 80:7                                           | 781.0587 | 0.012 ± 0.0012   |
| 80:6                                           | 782.0665 | 0.0078 ± 0.001   |
| 80:5                                           | 783.0092 | 0.011 ± 0.0011   |
| 18:2-20:4-22:6-22:6                            | 783.9883 | 0.029 ± 0.0054   |
| 18:2-20:3-22:6-22:6                            | 784.9961 | 0.09 ± 0.02      |
| 18:2-20:2-22:6-22:6                            | 786.0039 | 0.054 ± 0.0099   |
| 82:15                                          | 787.0118 | 0.027 ± 0.0053   |
| 82:14                                          | 788.0196 | 0.019 ± 0.0041   |

|                                                |          |                  |
|------------------------------------------------|----------|------------------|
| 82:13                                          | 789.0274 | 0.017 ± 0.002    |
| 82:12                                          | 790.0352 | 0.019 ± 0.002    |
| 82:11                                          | 791.0431 | 0.02 ± 0.002     |
| 82:10                                          | 791.9570 | 0.0096 ± 0.00084 |
| 82:9                                           | 792.9648 | 0.0088 ± 0.0019  |
| 82:8                                           | 793.9726 | 0.0076 ± 0.00074 |
| 84:21                                          | 794.9805 | 0.0089 ± 0.0007  |
| 20:4-20:4-22:6-22:6, 18:2-22:6-22:6-22:6 (1:1) | 795.9883 | 0.021 ± 0.003    |
| 20:4-20:4-22:6-22:5, 18:2-22:6-22:6-22:5 (1:1) | 796.9961 | 0.06 ± 0.013     |
| 20:4-20:3-22:6-22:5                            | 798.0039 | 0.022 ± 0.005    |
| 84:17                                          | 799.0118 | 0.011 ± 0.0014   |
| 84:16                                          | 800.0196 | 0.0057 ± 0.0016  |
| 84:15                                          | 801.0274 | 0.0081 ± 0.00065 |
| 84:14                                          | 802.0352 | 0.0057 ± 0.0011  |
| 84:13                                          | 803.0431 | 0.0088 ± 0.0018  |
| 84:12                                          | 804.0509 | 0.0073 ± 0.00037 |
| 84:11                                          | 805.0587 | 0.012 ± 0.00073  |
| 84:10                                          | 806.0665 | 0.01 ± 0.0018    |
| 84:9                                           | 807.0744 | 0.015 ± 0.0008   |
| 86:22                                          | 807.9883 | 0.015 ± 0.0018   |
| 86:21                                          | 808.9961 | 0.014 ± 0.0027   |
| 86:20                                          | 810.0039 | 0.0094 ± 0.0013  |
| 86:19                                          | 811.0118 | 0.0099 ± 0.0021  |
| 86:18                                          | 812.0196 | 0.0072 ± 0.001   |
| 86:17                                          | 813.0274 | 0.0079 ± 0.00066 |
| 86:16                                          | 814.0352 | 0.0066 ± 0.00069 |
| 86:15                                          | 815.0431 | 0.0058 ± 0.00077 |
| 86:14                                          | 816.0509 | 0.0055 ± 0.00071 |
| 86:13                                          | 817.0587 | 0.0096 ± 0.0011  |
| 86:12                                          | 818.0665 | 0.011 ± 0.0011   |
| 86:11                                          | 819.0744 | 0.014 ± 0.0014   |

|              |                 |                         |
|--------------|-----------------|-------------------------|
| <b>88:24</b> | <b>819.9883</b> | <b>0.0089 ± 0.00096</b> |
| <b>88:23</b> | <b>820.9961</b> | <b>0.0072 ± 0.00098</b> |
| <b>88:22</b> | <b>822.0039</b> | <b>0.007 ± 0.00026</b>  |
| <b>88:21</b> | <b>823.0118</b> | <b>0.013 ± 0.0018</b>   |
| <b>88:20</b> | <b>824.0196</b> | <b>0.0067 ± 0.00058</b> |
| <b>88:19</b> | <b>825.0274</b> | <b>0.0091 ± 0.001</b>   |
| <b>88:18</b> | <b>826.0352</b> | <b>0.0076 ± 0.00093</b> |
| <b>88:17</b> | <b>827.0431</b> | <b>0.0074 ± 0.00052</b> |
| <b>88:16</b> | <b>828.0509</b> | <b>0.0057 ± 0.00051</b> |
| <b>90:25</b> | <b>832.9961</b> | <b>0.01 ± 0.0015</b>    |
| <b>TOTAL</b> |                 | <b>6.78 ± 1.28</b>      |

---
