# Supplementary material
Source: PubMed Central journal article supplement (PMC6369710)

# Supplemental Figure 1

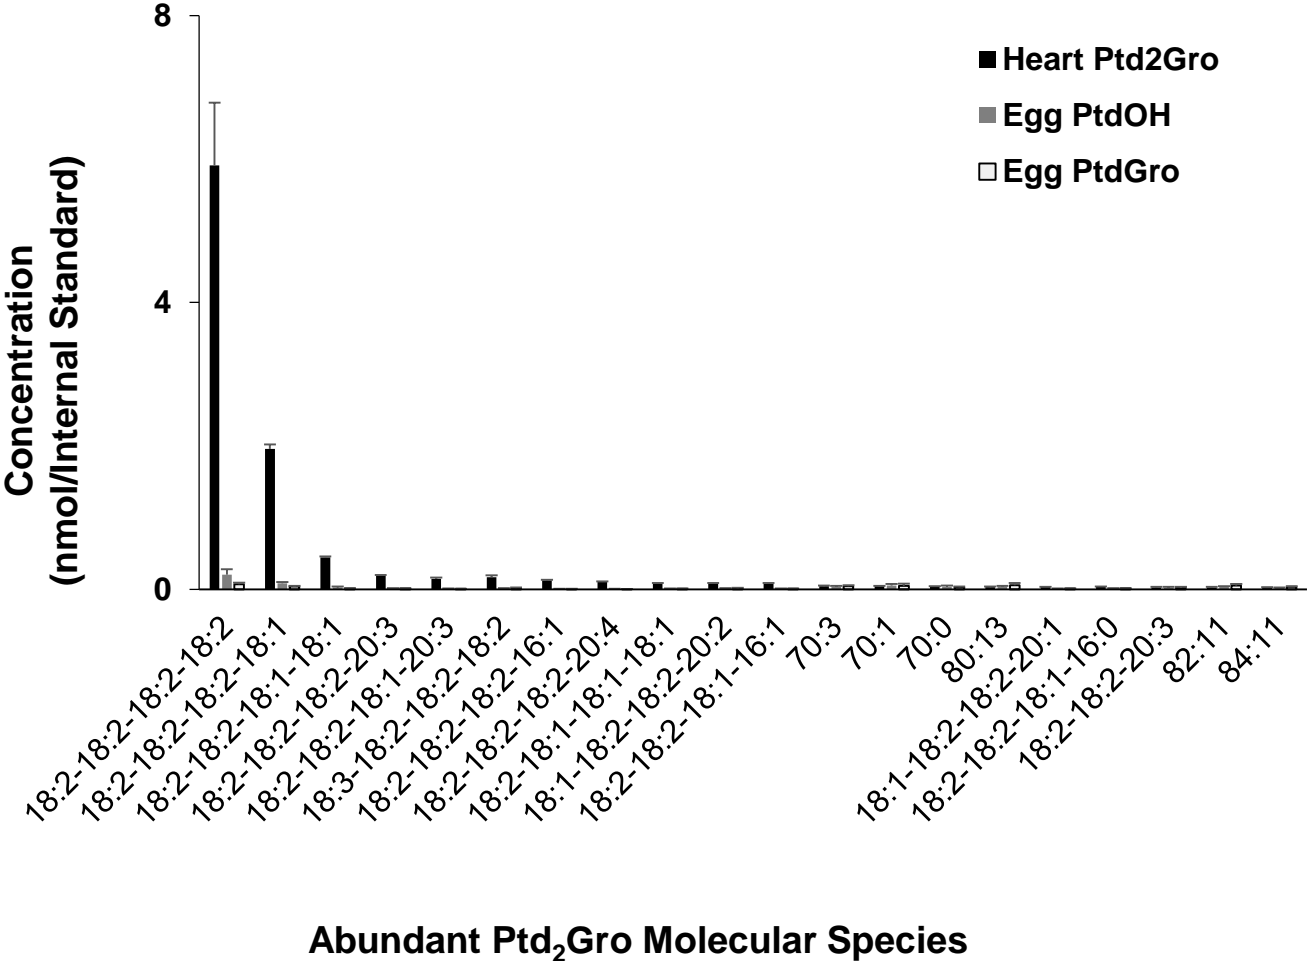

Supplement: NIHMS1009998-supplement-1.pdf [file NIHMS1009998-supplement-1.pdf]
